# Supplementary material for: The ketone body β-hydroxybutyrate ameliorates neurodevelopmental deficits in the GABAergic system of daf-18/PTEN Caenorhabditis elegans mutants
Source: eLife journal article supplement (doi:10.7554/elife.94520), 2024-04-08
Supplement: figures [file elife-94520-figures-v1.pdf]

---

## Figures and figure supplements

The ketone body  $\beta$ -hydroxybutyrate ameliorates neurodevelopmental deficits in the GABAergic system of *daf-18/PTEN* *Caenorhabditis elegans* mutants

**Sebastián Giunti et al.**

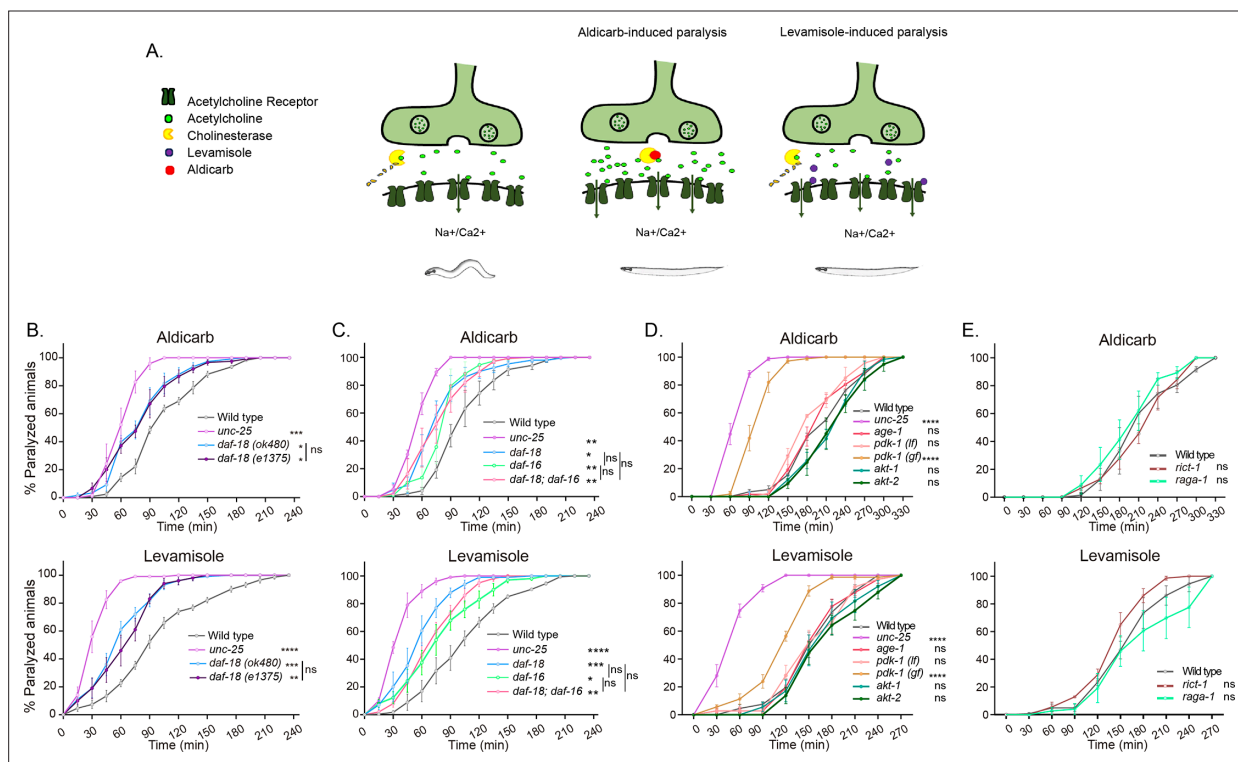

**Figure 1.** *daf-18/PTEN* mutants are hypersensitive to cholinergic drugs. **(A)** Schematic representation of paralysis induced by aldicarb and levamisole. Aldicarb acts by inhibiting acetylcholinesterase, leading to an accumulation of acetylcholine at the neuromuscular junction, resulting in continuous stimulation of muscles and worm paralysis. Levamisole functions as an agonist at nicotinic acetylcholine receptors, causing prolonged depolarization and, also, muscle paralysis. **(B–E)** Quantification of paralysis induced by aldicarb (top) and levamisole (bottom). The assays were performed in nematode growth media (NGM) plates containing 2 mM aldicarb or 0.5 mM levamisole. Strains tested: N2 (wild-type) **(B–E)**, CB1375 *daf-18(e1375)* **(B)**, OAR144 *daf-18(ok480)* **(B, C)**, GR1310 *akt-1(mg144)* **(D)**, TJ1052 *age-1(hx546)* **(D)**, VC204 *akt-2(ok393)* **(D)**, VC222 *raga-1(ok386)* **(E)**, and KQ1366 *ric-1(ft7)* **(E)**. All of these strains carry loss-of-function mutations. Furthermore, the strains denoted as '*pdk-1(lf)*' and '*gf*' correspond to JT9609 *pdk-1(sa680)*, which possesses a loss-of-function mutation, and GR1318 *pdk-1(mg142)*, which harbors a gain-of-function mutation in the *pdk-1* gene, respectively. The strain CB156 *unc-25(e156)* was included as a strong GABA-deficient control **(B–D)**. At least four independent trials for each condition were performed ( $n = 25–30$  animals per trial). One-way analysis of variance (ANOVA) was used to test statistical differences in the area under the curve (AUC) among different strains. *Post hoc* analysis after one-way ANOVA was performed using Tukey's multiple comparisons test **(B, C)** and Dunnett's to compare against the wild-type strain **(D, E)** (ns  $p > 0.05$ ; \* $p \leq 0.05$ ; \*\* $p \leq 0.01$ ; \*\*\* $p \leq 0.001$ ; \*\*\*\* $p \leq 0.0001$ ).

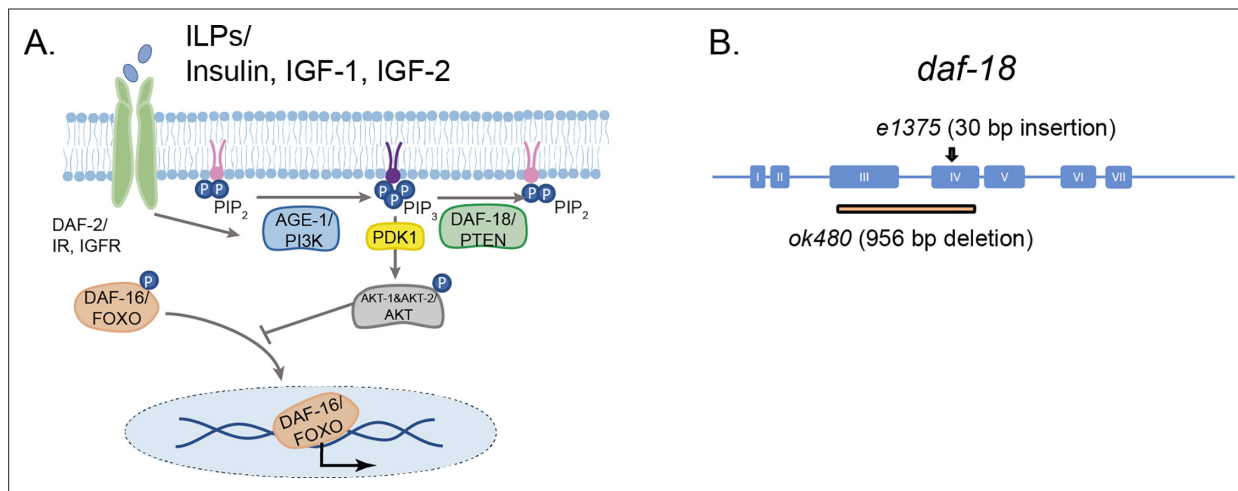

**Figure 1—figure supplement 1.** *daf-18/PTEN* is the negative modulator of the phosphatidylinositol 3-phosphate kinase (PI3K)/AKT pathway. **(A)** *daf-18/PTEN* encodes a lipid and protein phosphatase that hydrolyzes phosphatidylinositol (3,4,5)-trisphosphate (PIP<sub>3</sub>) to phosphatidylinositol-4,5-bisphosphate (PIP<sub>2</sub>). It is the main negative modulator of PDK and AKT activity. In *daf-18/PTEN* mutants, AKT is overactivated leading to high levels of DAF-16/FOXO phosphorylation that prevents the translocation of this transcription factor to the nucleus. **(B)** Gene structure of *daf-18*. Coding sequences are represented by blue boxes. The *daf-18* (*e1375*) mutant allele inserts a 30-bp sequence in exon IV. This insertion occurs downstream of the phosphatase catalytic domain and causes a frameshift that leads to premature truncation of the protein. This *e1375* mutation partially reduces DAF-18 function. The *daf-18* (*ok480*) allele contains a 956-bp deletion that removes most of exons 3 and 4 and is generally considered to be a null allele.

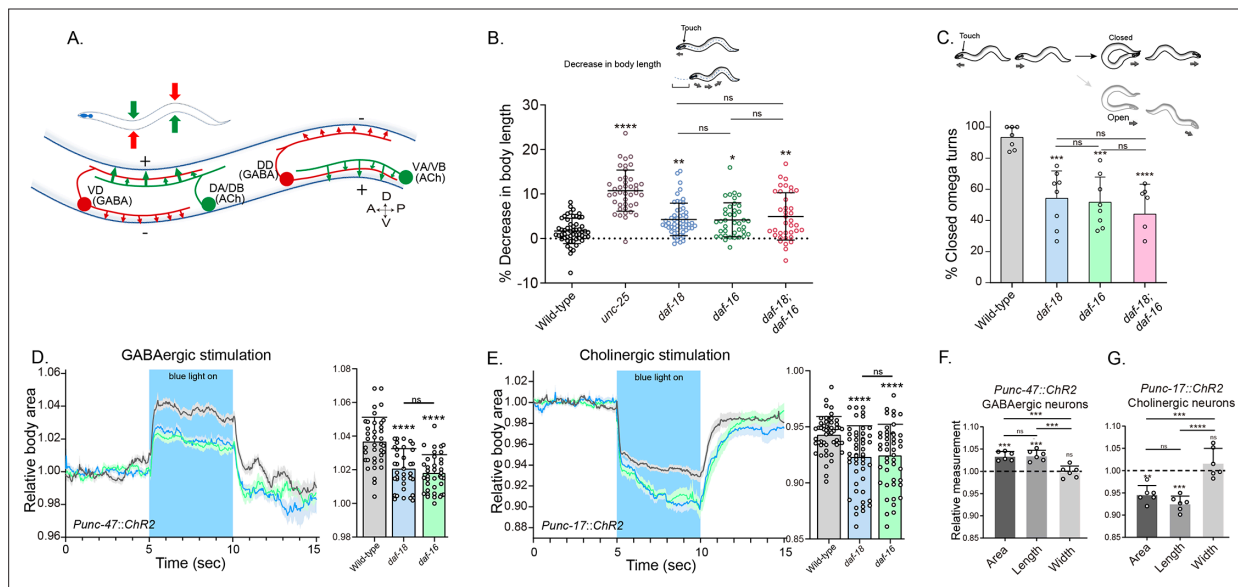

**Figure 2.** *daf-18/PTEN* mutants exhibit phenotypes typical of GABA-deficient animals. **(A)** Schematic of *C. elegans* adult neuromuscular circuit. Red indicates GABAergic motor neurons (DD/VD) and green indicates cholinergic motor neurons (VA/VB and DA/DB). The VA and VB cholinergic motor neurons send synaptic inputs to the ventral body wall muscles and the DD GABAergic motor neurons. The release of ACh from VA/VB neurons leads to the contraction of the ventral body wall muscles and the activation of DD GABAergic motor neurons that release GABA on the opposite side of the worm, causing relaxation of the dorsal body wall muscles. Conversely, activation of the DA and DB cholinergic motor neurons produces contraction of the dorsal body wall muscles and activates the VD GABAergic motor neurons. The VD GABAergic motor neurons release GABA, causing relaxation of the ventral body wall muscles, and thus contralateral inhibition. **(B)** Quantification of body shortening in response to anterior touch. Data are represented as mean  $\pm$  standard deviation (SD).  $n = 50-70$  animals per genotype distributed across four independent experiments. Kruskal–Wallis analysis with Dunn’s post-test for multiple comparisons was performed. **(C)** (Top) Scheme of *C. elegans* escape response in nematode growth media (NGM) agar. After eliciting the escape response by an anterior gentle touch, the omega turns were classified as closed (head and tail are in contact) or open (no contact between head and tail). (Bottom) Quantification of % closed omega turns/total omega turns. At least six independent trials for each condition were performed ( $n = 20-25$  animals per genotype/trial). Data are represented as mean  $\pm$  SD. One-way analysis of variance (ANOVA) with Tukey’s post-test for multiple comparisons was performed. **(D–E)** Light-evoked elongation/contraction of animals expressing Channelrhodopsin (ChR2) in GABAergic **(D)** and cholinergic **(E)** motoneurons. Animals were filmed before, during, and after a 5-s pulse of 470 nm light stimulus (15 frames/s). The body area in each frame was automatically tracked using a custom FIJI-ImageJ macro. The averaged area of each animal during the first 125 frames (0–5 s) established a baseline for normalizing light-induced body area changes. To compare the changes induced by optogenetic activity between different strains, the body area measurements for each animal were averaged from second 6 (1 s after the blue light was turned on) to second 9 (1 s before the light was turned off). These mean  $\pm$  SD values are depicted in the bar graph shown to the right of each trace representation ( $n = 40-55$  animals per genotype). Tukey’s multiple comparisons method following one-way ANOVA was performed for D, while Dunn’s multiple comparisons test after Kruskal–Wallis analysis was used in E. **(F, G)** Manual Measurement of body length and width upon optogenetic stimulation of GABAergic **(F)** and cholinergic **(G)** neurons. At the 2.5 s time point of light stimulation, we manually measured both the width and length of multiple animals and compared these measurements with the corresponding areas obtained from automated analysis (see Materials and methods). The Y-axis represents the ratio between measurements taken before and after blue light illumination. We performed an ANOVA with Tukey’s post hoc analysis for multiple comparisons using the normalized value (1.000) as the baseline. The area and length show significant differences compared to the measurements prior to illumination and do not differ significantly from each other indicating they vary together (increasing for *unc-47::ChR2* and decreasing for *unc-17::ChR2* animals upon blue light stimulation). In contrast, the width values are not statistically different from the pre-stimulation measurements ( $p = 0.505$  for *unc-47::ChR2*;  $p = 0.996$  for *unc-17::ChR2*). This suggests that the changes in area detected by our automated method are due to variations in length. The six animals analyzed to validate the automated measurement were randomly selected from the optogenetic experiments. Data are shown as mean  $\pm$  SD (ns  $p > 0.05$ ; \* $p \leq 0.05$ ; \*\* $p \leq 0.01$ ; \*\*\* $p \leq 0.001$ ; \*\*\*\* $p \leq 0.0001$ ).



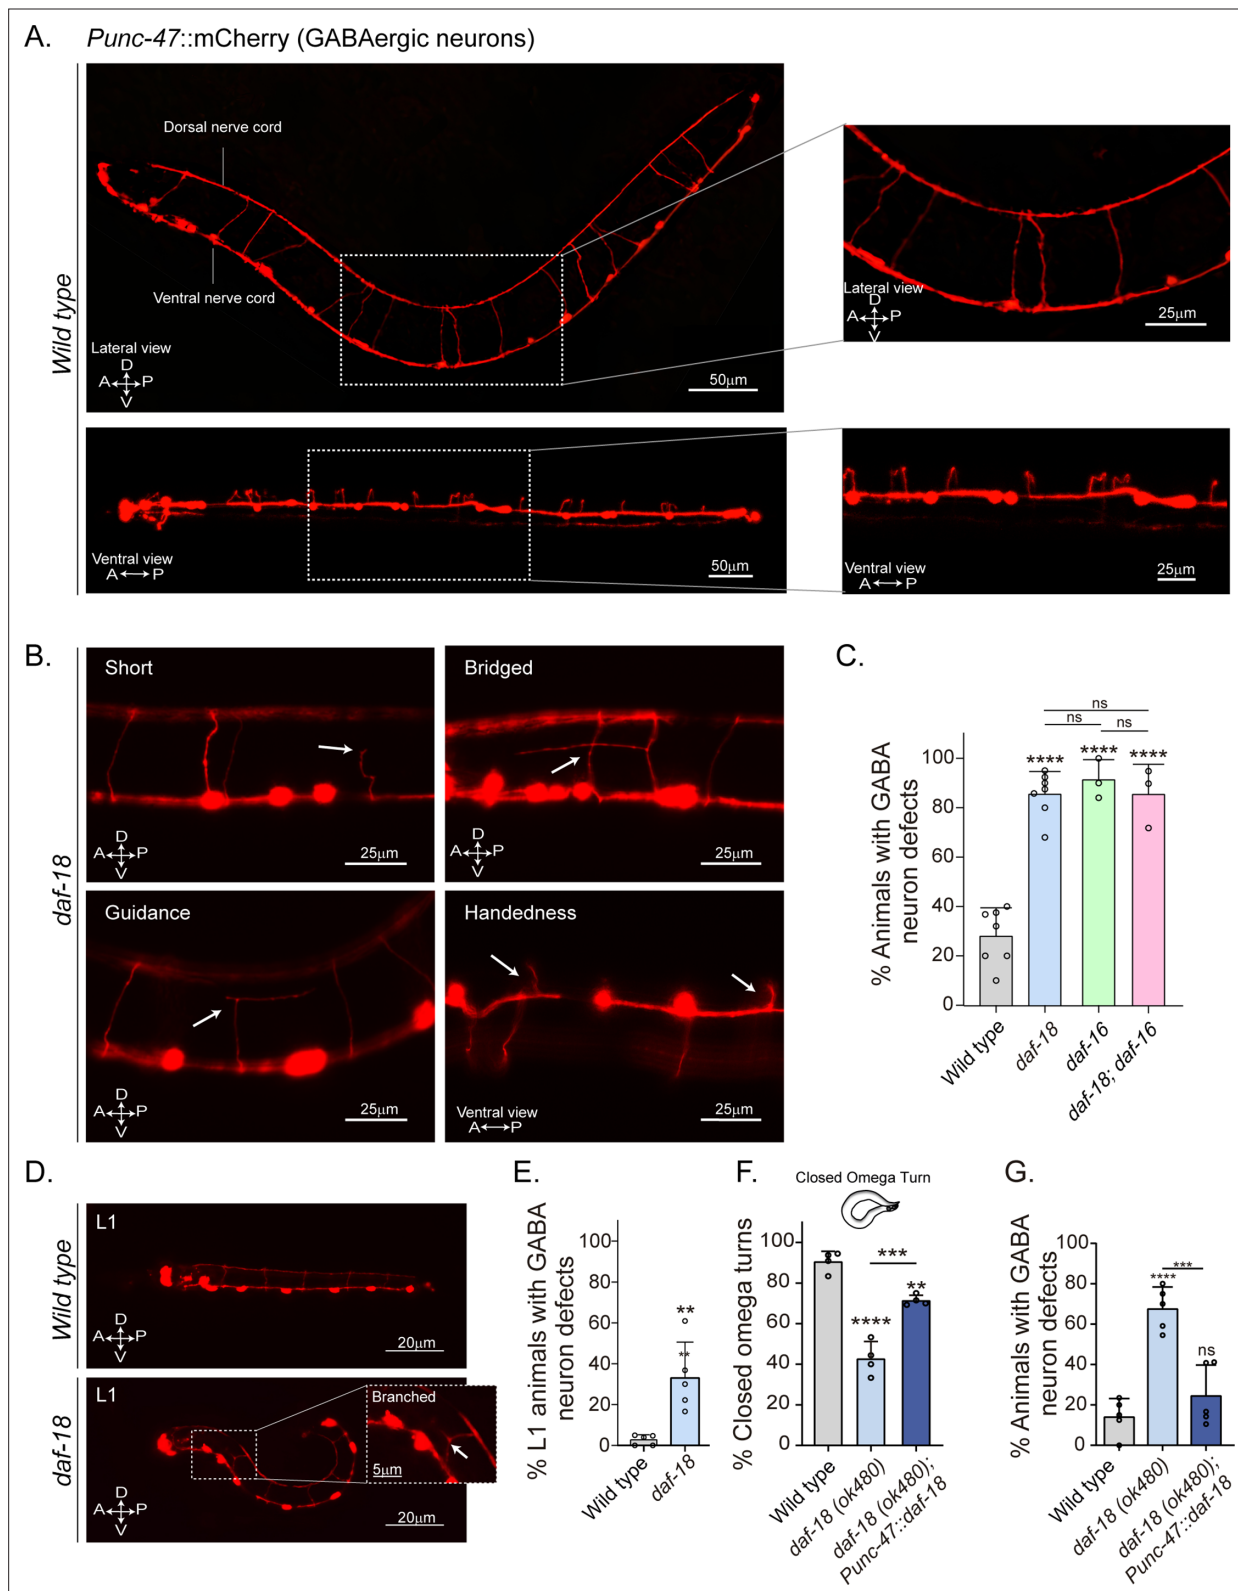

**Figure 3.** *daf-18/PTEN* mutants show neurodevelopmental defects in GABAergic motor neurons. **(A)** Representative images of wild-type animals expressing *mCherry* in the GABAergic motor neurons are shown laterally (top) and ventrally (bottom). In the insets, commissures are depicted at a higher resolution. Note that in the ventral view, all the processes travel through the right side of the animal's body. **(B)** Representative images of commissure defects observed in *daf-18 (ok480)* mutants (arrows). The defects shown are: Short, commissure length less than half of nematode width;

Figure 3 continued on next page

## Figure 3 continued

Bridged, neighboring commissures linked by a neurite; Guidance, commissures that do not reach dorsal nerve cord; and Handedness, commissure running along the opposite side of the animal's body. **(C)** Quantification of GABAergic system defects. Each bar represents the mean  $\pm$  standard deviation (SD). One-way analysis of variance (ANOVA) and Tukey's multiple comparisons test were used for statistics (ns  $p > 0.05$ ; \*\*\*\* $p \leq 0.0001$ ). At least three independent trials for each condition were performed ( $n$ : 20–25 animals per genotype/trial). **(D)** Representative image of L1 animals (1 hr post-thatch) expressing *Punc-47::mCherry* in wild-type (top) and *daf-18(ok480)* mutant (bottom) backgrounds. In this larval stage, only six GABAergic DD motor neurons are born. The inset shows a typical defective (branched) commissure. **(E)** Quantification of GABAergic system defects in L1s. Each bar represents the mean  $\pm$  SD. Two-tailed unpaired Student's *t*-test (\*\* $p \leq 0.01$ ). At least five independent trials for each condition were performed ( $n$ : ~20 animals per genotype/trial). **(F, G)** Quantification of closed omega turns/total omega turns and commissure defects in GABAergic neurons of animals expressing *daf-18/PTEN* solely in GABAergic neurons. One-way ANOVA and Tukey's multiple comparisons test were used for statistics (ns  $p > 0.05$ ; \*\* $p \leq 0.01$ ; \*\*\* $p \leq 0.001$ ; \*\*\*\* $p \leq 0.0001$ ). At least four independent trials for each condition were performed ( $n$ : 15–20 animals per genotype/trial). A – anterior; P – posterior; D – dorsal; V – ventral.

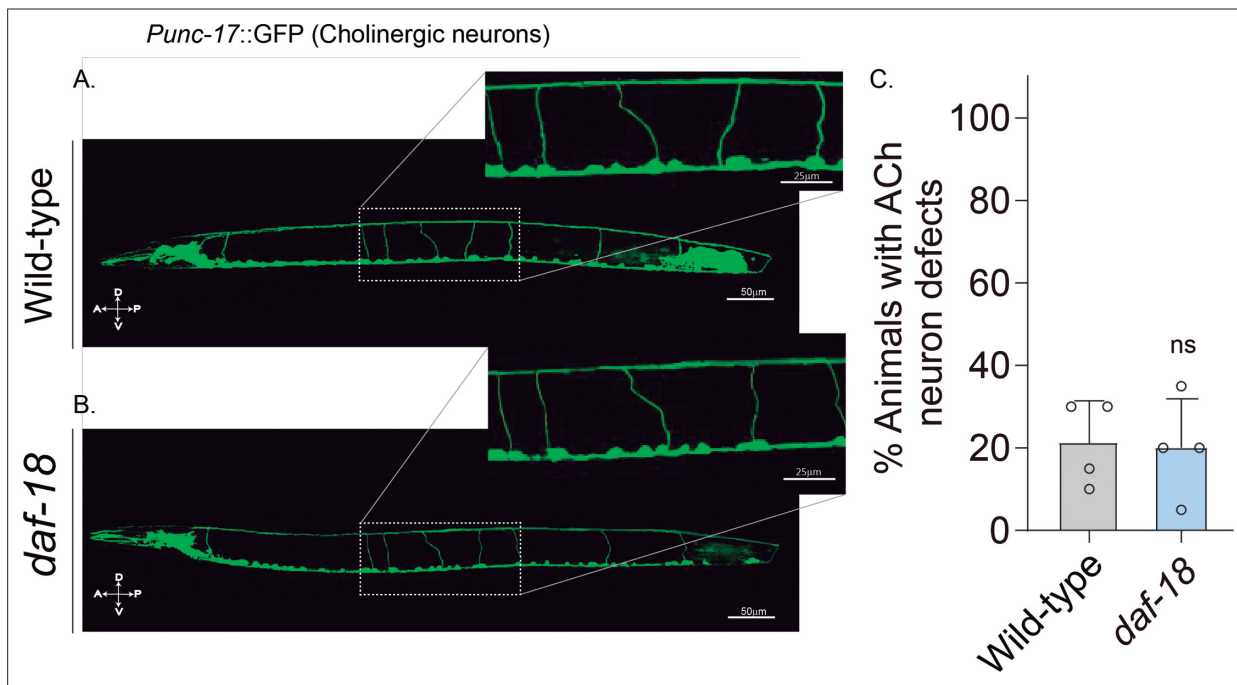

**Figure 3—figure supplement 1.** *daf-18/PTEN* mutations do not affect excitatory cholinergic motor-neuron morphology. (A–B) Representative images of animals expressing GFP in the cholinergic neurons. In the insets, the commissural processes can be appreciated with higher resolution. (C) Quantification of cholinergic system defects. Each bar represents the mean  $\pm$  standard deviation (SD) for at least four trials (~20 animals per trial). Statistical significance between the strains was determined by two-tailed unpaired Student's t-test (ns  $p > 0.05$ ). A – anterior; P – posterior; D – dorsal; V – ventral.

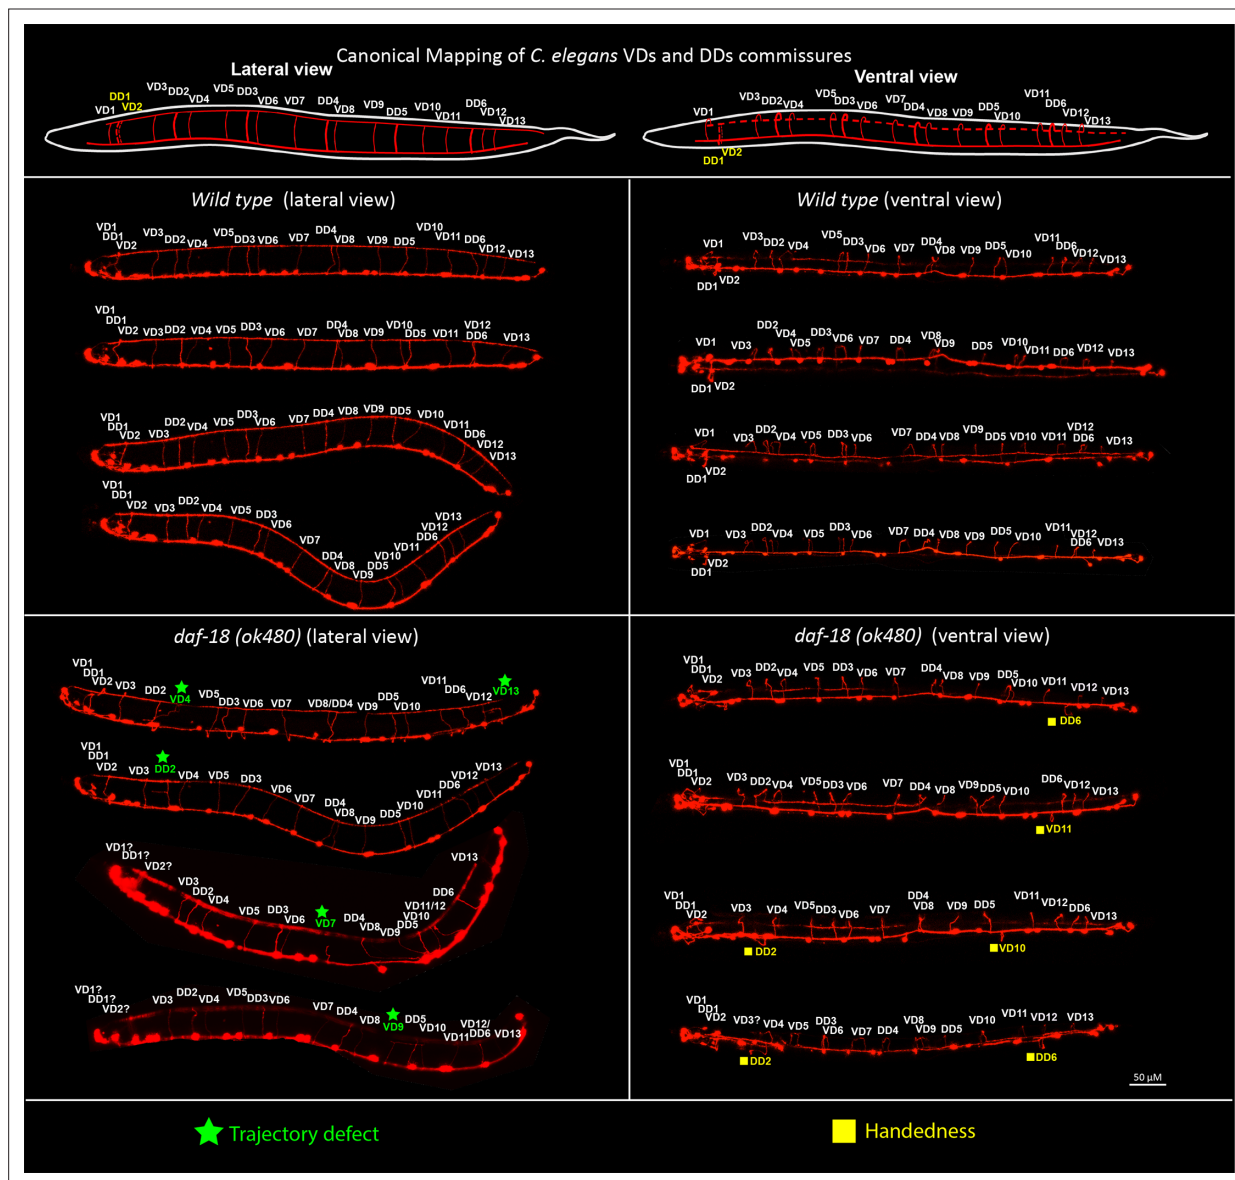

**Figure 3—figure supplement 2.** *daf-18/PTEN* deficiencies affect DDs and VDs GABAergic neurons. Top, schematic representation of the location of the commissures belonging to the two types of GABAergic neurons in lateral and ventral views (based on [Belew et al., 2023](#); [Gujar et al., 2017](#)). Below, representative images of wild-type and *daf-18(ok480)* worms viewed laterally (left) and ventrally (right). Note that in both lateral and ventral views (handedness errors) defects appear in both DDs and VDs neurons. Errors in the first three commissures were not considered due to the difficulty of identifying the commissures corresponding to VD1, DD1, and VD2 neurons.

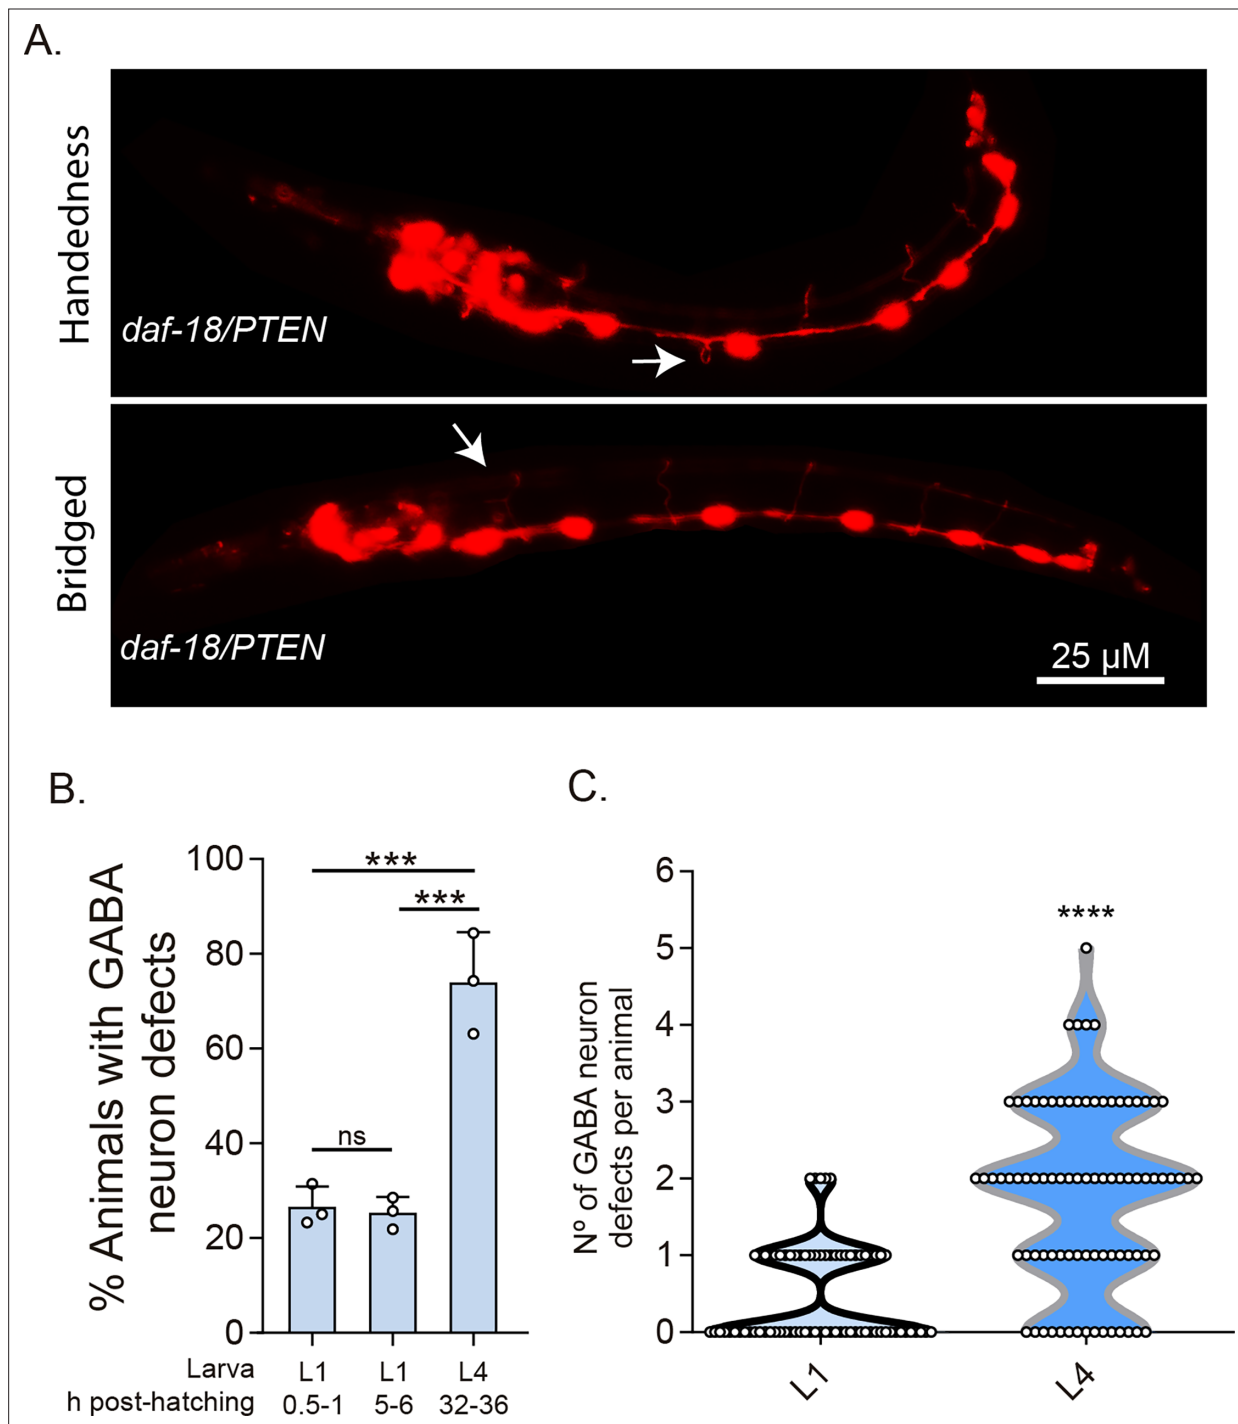

**Figure 3—figure supplement 3.** DD-GABAergic neurons show defects in recently hatched L1 animals of *daf-18/PTEN* mutants. **(A)** Representative images of the most common errors observed in L1 animals (1 hr post-hatch) of *daf-18* mutants. These types of defects, plus others such as short commissures and guidance defects, are also observed in L4 animals (**Figure 3** and **Figure 3—figure supplement 2**). **(B)** GABAergic commissure defects were quantified in *daf-18/PTEN* mutants at various developmental stages: 0.5–1 hr post-hatching (early L1 larva), 5–6 hr post-hatching (mid-L1 larva), and L4 stage (32–36 hr post-hatching). Three independent trials for each condition were performed, with at least 30 animals per condition/trial. Results are presented as mean  $\pm$  standard deviation (SD). A one-way analysis of variance (ANOVA) with Tukey's post hoc test was used (ns  $p > 0.05$ ; \*\*\* $p \leq 0.001$ ; \*\*\*\* $p \leq 0.0001$ ). **(C)** Quantification of the number of errors per animal in L1 and L4 larvae. Statistical significance was determined by Mann–Whitney test (\*\*\*\* $p \leq 0.0001$ ;  $n = 75$ –80).

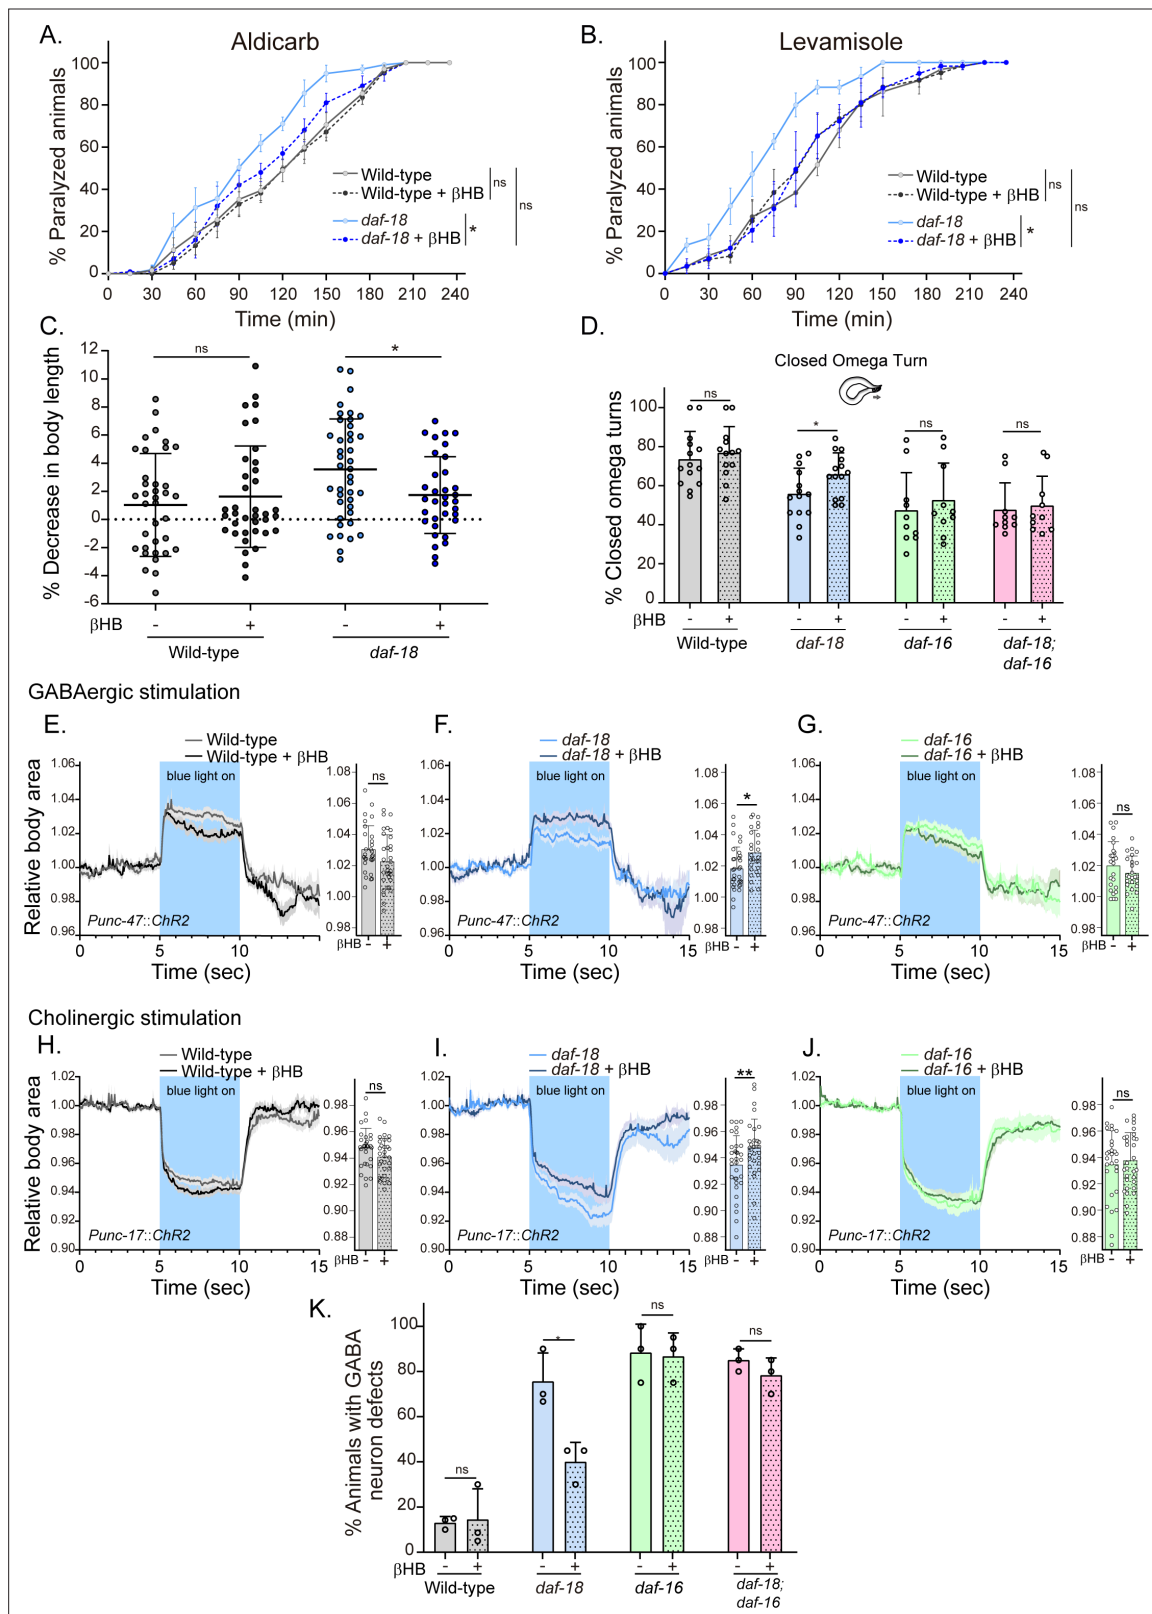

**Figure 4.** Dietary  $\beta$ -hydroxybutyrate ( $\beta$ HB) supplementation ameliorates GABAergic deficits in *daf-18/PTEN* mutants. Animals were exposed to  $\beta$ HB (20 mM) throughout development (from embryo to L4/young adults). (A, B) Quantification of paralysis induced by cholinergic drugs. At least four independent trials for each condition were performed ( $n$ : 20–25 animals per genotype/trial). Two-tailed unpaired Student's  $t$ -test (ns  $p > 0.05$ ; \* $p \leq 0.05$ ; \*\* $p \leq 0.01$ ) was used to compare  $\beta$ HB treated and untreated animals. (C) Measurement of body length in response to anterior touch.  $n$  = 30–40 animals

Figure 4 continued on next page

*Figure 4 continued*

per genotype distributed across three independent experiments. Two-tailed unpaired Student's *t*-test was used to compare  $\beta$ HB treated and untreated animals (ns  $p > 0.05$ ;  $*p \leq 0.05$ ). **(D)** Quantification of closed omega turns/total omega turns during the escape response. At least eight independent trials for each condition were performed ( $n = 20$  animals per genotype/trial). Results are presented as mean  $\pm$  standard deviation (SD). Two-tailed unpaired Student's *t*-test (ns  $p > 0.05$ ;  $*p \leq 0.05$ ). Light-evoked elongation/contraction of animals expressing Channelrhodopsin (ChR2) in GABAergic **(E–G)** and cholinergic **(H–J)** motoneurons. The mean body area (mean  $\pm$  SD) during 3 s of the light pulse is depicted in the bar graph shown to the right of each trace representation (see **Figure 2**) ( $n = 25$ – $35$  animals per condition). Two-tailed unpaired Student's *t*-test (ns  $p > 0.05$ ;  $*p \leq 0.05$ ;  $**p \leq 0.01$ ). **(K)** Quantification of commissure defects in GABAergic neurons. Results are presented as mean  $\pm$  SD. Two-tailed unpaired Student's *t*-test (ns  $p > 0.05$ ;  $*p \leq 0.05$ ). At least three independent trials for each condition were performed ( $n = \sim 20$  animals per genotype/trial).



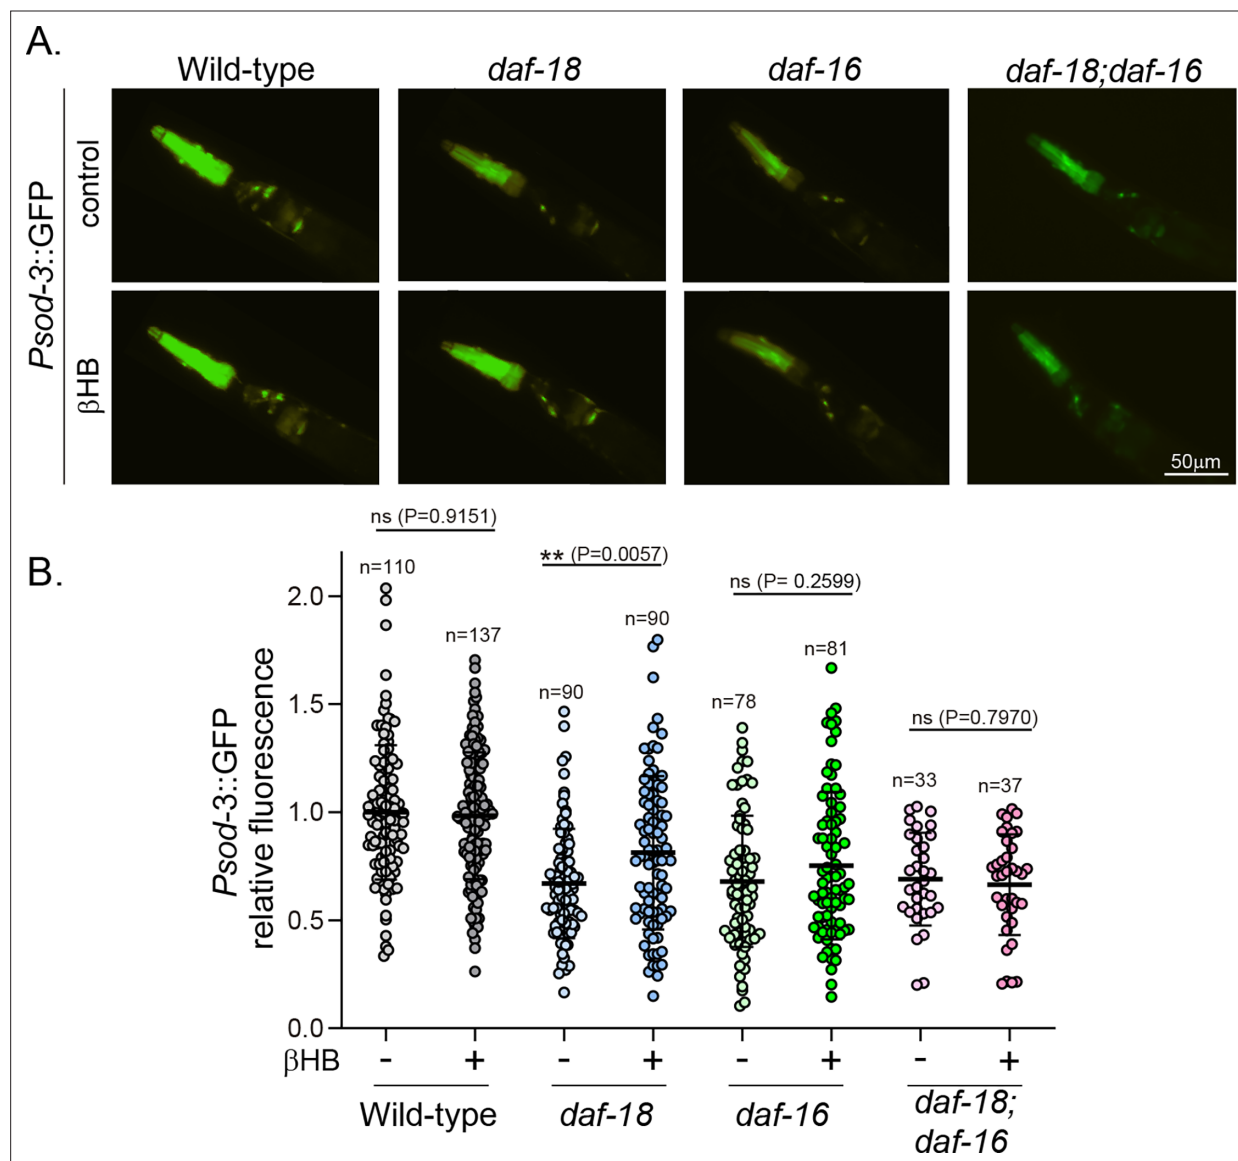

**Figure 4—figure supplement 1.** Exposure to  $\beta$ -hydroxybutyrate ( $\beta$ HB) induces *sod-3* expression in *daf-18/PTEN*, but not in *daf-16/FOXO* mutants. **(A)** Representative fluorescence images ( $\times 20$  magnification) of worms expressing *Psod-3::GFP* in different genetic backgrounds (wild-type, *daf-18(ok480)*, *daf-16(mgDf50)* and *daf-18(ok480); daf-16(mgDf50)*) upon exposure to  $\beta$ HB (20 mM). **(B)** Corresponding quantification of the fluorescence intensity per animal in the head. Scatter dot plot (line at the median) with the relative expression of *Psod-3::GFP* normalized to naive wild-type animals. Statistical significance between the treatment and the corresponding control was determined by Mann–Whitney test (ns  $p > 0.05$ ; \*\* $p \leq 0.01$ ,  $n = 40$ – $90$ ).



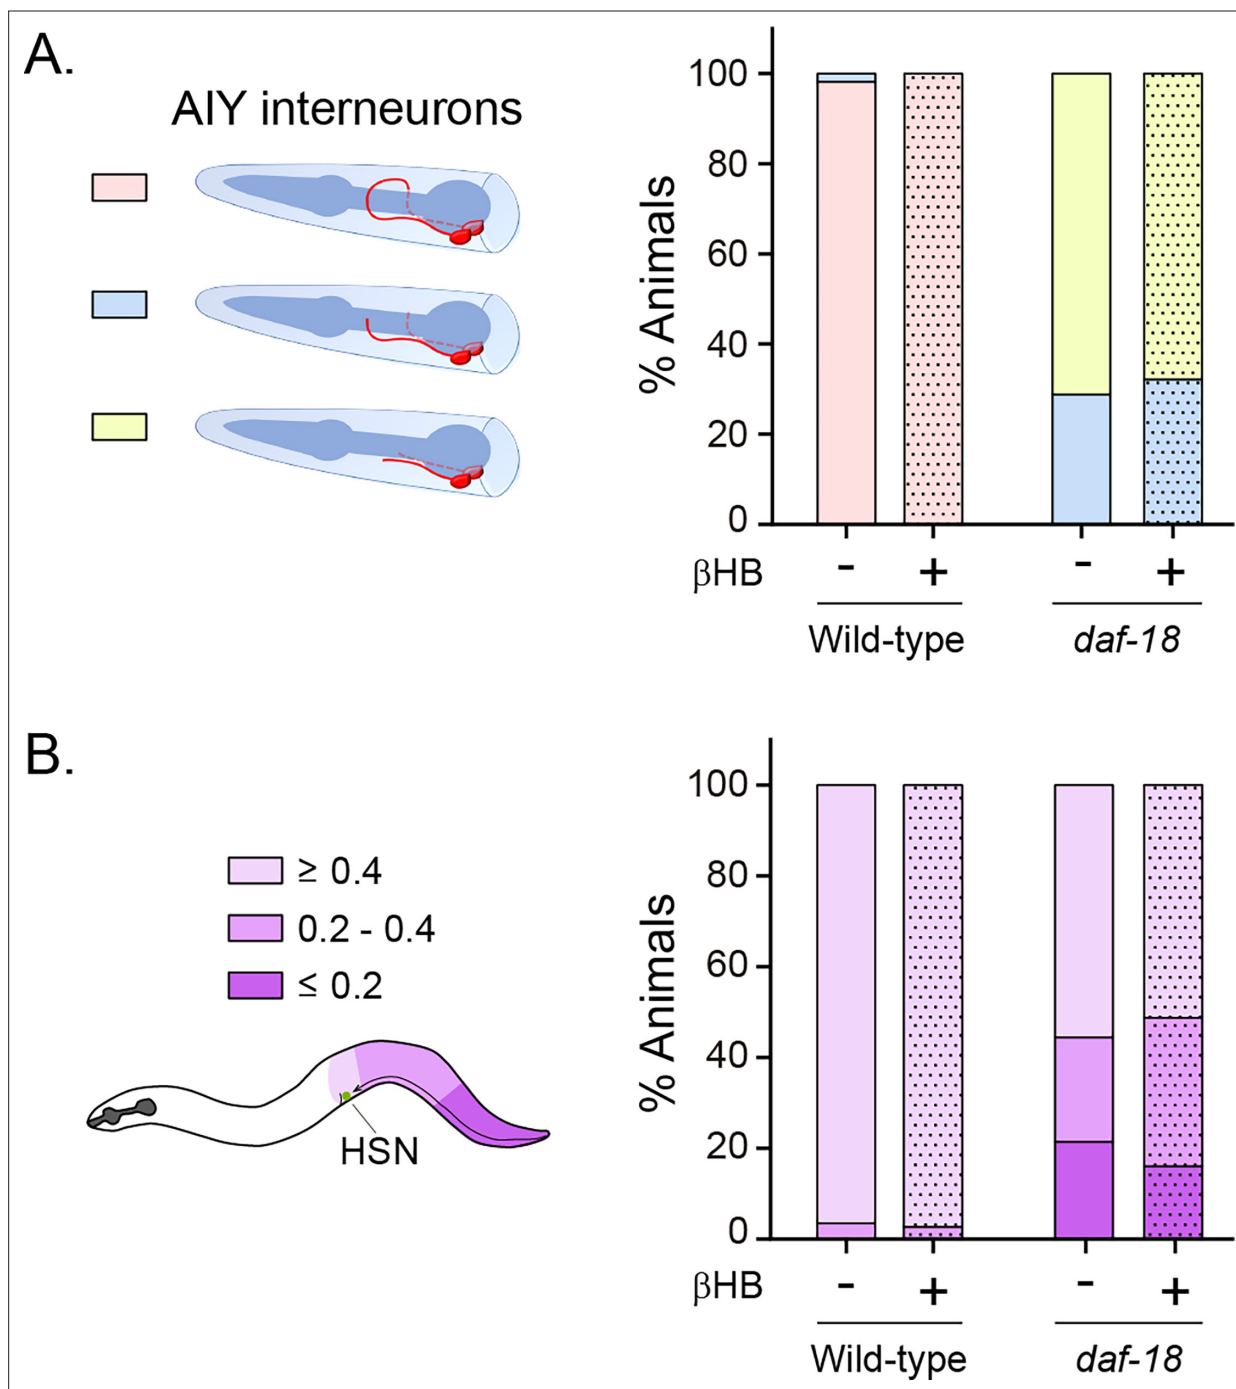

**Figure 4—figure supplement 2.**  $\beta$ -Hydroxybutyrate ( $\beta$ HB) does not prevent neurodevelopmental defects in AIY and HSN neurons. **(A)** AIY processes were visualized in transgenic animals expressing cytoplasmic GFP in AIY neurons (*Pttx-3b::GFP*) in wild-type and *daf-18(ok480)* mutant backgrounds. AIY neuronal growth defects were quantified as described before (Christensen et al., 2011). Left: Scheme of AIY morphology and location in the nematode nerve ring. Blue, pharynx; red, AIY interneurons; pink, wild-type AIY morphology. The two interneurons meet at the dorsal midline. Light blue and yellow: denote different levels of AIY neurite truncation. Right: Percentage of animals with truncated neurites in wild-type and *daf-18(ok480)* mutants under exposure (or not) to  $\beta$ HB (20 mM). **(B)** HSN were visualized in transgenic animals expressing GFP in serotonergic neurons (*Ptph-1::GFP*) in wild-type and *daf-18(ok480)* mutant backgrounds. HSN under-migration defects were identified as described before (Kennedy et al., 2013). Left: Schematic representation of the HSN migratory route during embryogenesis and the corresponding location of the HSN (green circle) in a young adult animal. Only one of two bilaterally symmetric HSNs is illustrated. Colors show information about the position of HSNs: Light purple: complete migration ( $\geq 0.4$ ), middle purple: intermediated migration ( $>0.2$  to  $<0.4$ ), dark purple: unmigrated ( $\leq 0.2$ ). Right: Quantification of the percentage of animals with different HSN migration positions (the most under-migrated neuron of each animal is considered). Bars represent the mean values of at least three independent experiments. Note that there is no significant effect with  $\beta$ HB treatment compared to controls.

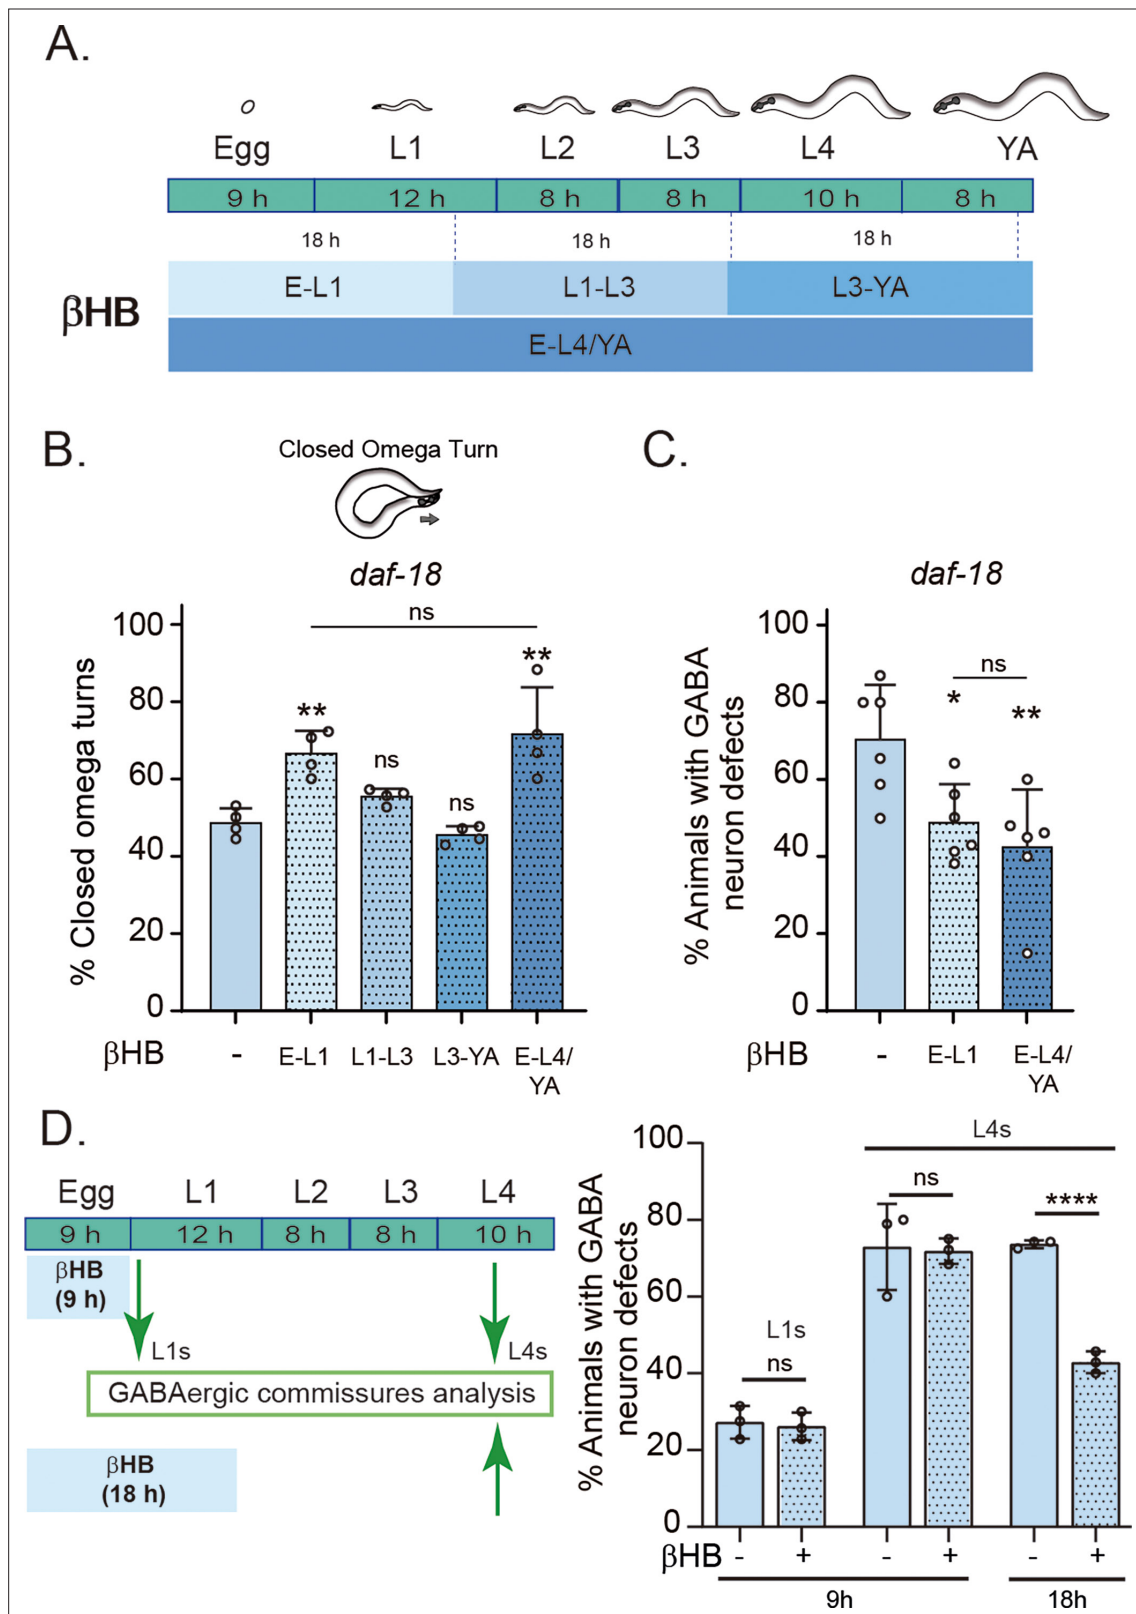

**Figure 5.** Early developmental stages are critical for  $\beta$ -hydroxybutyrate ( $\beta$ HB) modulation of GABAergic signaling. **(A)** Animals were exposed to  $\beta$ HB-enriched diet for 18 hr periods at different developmental stages: (1) E-L1 covered ex utero embryonic development (~9 hr) and the first 8–9 hr of the L1 stage; (2) L1–L3 covered the latter part of the L1 stage (~3–4 hr), the entire L2 stage (~8 hr), and most of the L3 stage (~6–7 hr); (3) L3–YA (Young Adult) spanned the latter part of the L3 stage (~1–2 hr), the entire L4 stage (~10 hr), and the first 6–7 hr as adults, and (4) E-L4/YA implies exposure throughout

Figure 5 continued on next page

## Figure 5 continued

development (from embryo to Young Adult). Quantification of closed omega turns/total omega turns in *daf-18/PTEN* (**B**) and GABAergic commissure defects (**C**) in *daf-18/PTEN* mutants exposed to  $\beta$ HB at different developmental intervals. Four and six independent trials for each condition were performed in B and C, respectively ( $n = 20$ –25 animals per genotype/trial). Results are presented as mean  $\pm$  standard deviation (SD). One-way analysis of variance (ANOVA) with Tukey's post-test for multiple comparisons was performed (ns  $p > 0.05$ ; \* $p \leq 0.05$ ; \*\* $p \leq 0.01$ ). (**D**)  $\beta$ HB does not prevent neurodevelopmental defects in GABAergic neurons when applied exclusively during ex utero embryonic development. Quantification of GABAergic commissure defects in L4-stage of *daf-18/PTEN* mutant animals exposed to  $\beta$ HB during the first 9 hr post-egg laying (just before hatching) and 18 hr post-egg laying. The animals were then transferred to control plates without  $\beta$ HB and maintained until GABAergic commissures analysis. Scoring was performed in 0.5–1 hr post-hatching (early L1 larva) and L4 animals (green arrows). A two-tailed unpaired Student's *t*-test was used for statistical analysis. Data represent three independent trials with at least 20 worms per trial. Results are presented as mean  $\pm$  SD. (ns  $P > 0.05$ ; \*\*\*\*  $P \leq 0.0001$ ).
